# Supplementary material for: Integrating artificial intelligence (AI) in healthcare: advancing older adults’ health management in Saudi Arabia through AI-powered chatbots
Source: PeerJ Comput Sci. 2025 Mar 27;11:e2773. doi: 10.7717/peerj-cs.2773 (PMC12190517; doi:10.7717/peerj-cs.2773)
Supplement: Supplemental Information 1 [file peerj-cs-11-2773-s001.xlsx]

## Sheet: Coded
Gender	Income	Education	Chabot Access	Reason	HED1	HED2	HED3	FAC1	FAC2	FAC3	FAC4	SOC1	SOC2	PER1	PER2	PER3	EFF1	EFF2	CON1	CON2	CON3	CON4	SAT1	SAT2	SAT3	COT1	COT2	COT3	HPU1	HPU2	HPU3	SEC1	SEC2	SEC3
1 = "Male";2 = "Female"	1 = "Prefer not to say";2 = "Less than 16,000 SAR";3 = "Between 16,000 SAR and 26,000 SAR";4 = "More than 26,000 SAR";5 = "Do Not Know"	1 = "High school";2 = "Bachelor’s Degree";3 = "Master";4 = "Doctorate"	1 = "From PC";2 = "From Smart Phone/Tablet"	1 = "To schedule appointments";2 = "To get prescription refill";3 = "To get medical Assistant";4 = "To get information about disease prevention";5 = "To inquiry about insurance claims"	Using healthcare chatbot application is fun.	Using healthcare chatbot application is pleasant	Using healthcare chatbot application is enjoyable and fascinating	I have the resources necessary to use the healthcare chatbot applications.	I have the knowledge necessary to use healthcare chatbot applications.	My computer is compatible with the healthcare chatbot applications.	A specific group is available for assistance with difficulties associated with the healthcare chatbot applications.	People who are important to me think that I should use healthcare chatbot applications for my healthcare services.	People who influence my behaviors recommend that I use healthcare chatbot applications	The healthcare chatbot gives me the right answers.	The healthcare chatbot understands complex conversation.	The healthcare chatbot performance is equal to humans.	The healthcare chatbot is easy to use.	Learning to use healthcare chatbot is easy.	My experience with using the healthcare chatbot application was better than I expected	The service level provided by the healthcare chatbot application was better than I expected	The healthcare chatbot applications can meet demands in excess of what I required for the service.	Overall, most of my expectations from using the healthcare chatbot applications were confirmed.	I am satisfied with my decision to use healthcare chatbot.	My decision to use the healthcare chatbot application was a wise one.	I am happy with my earlier decision to use healthcare chatbot application	I intend to continue using healthcare chatbot application rather than discontinue its use.	I intend to continue using healthcare chatbot applications rather than other alternative means.	If I could, I would like to sustain my use of healthcare chatbot applications for my healthcare services.	I perceive that this chatbot is friendly to me during the conversation	The chatbot gave some smart suggestions based on my responses.	I feel this chatbot is sociable	I feel secure in providing sensitive information to chatbot.	The information that chatbot has about me is protected.	I trust that my personal information with chatbot application will not be misused.
1	3	3	1	3	5	3	3	4	4	3	4	3	3	5	4	5	5	4	5	5	5	5	4	5	5	3	3	3	3	3	2	4	5	4
1	3	3	1	2	4	5	2	5	2	4	5	4	3	4	4	4	3	4	3	4	4	1	4	3	3	4	4	5	4	4	3	4	1	5
1	5	3	2	5	5	5	5	1	1	5	5	2	3	5	5	5	5	5	5	5	5	5	5	5	5	5	5	5	5	5	5	5	4	5
1	3	3	2	2	4	4	4	4	4	4	4	3	3	5	5	5	4	4	4	4	3	3	4	3	4	4	4	4	4	4	4	4	4	4
2	4	3	2	4	4	4	5	4	1	4	4	2	3	1	1	4	4	2	1	3	2	4	2	2	5	2	3	3	4	3	5	4	4	2
1	2	3	2	4	4	4	3	3	3	4	4	2	3	4	4	4	4	4	4	4	4	4	4	4	4	4	3	4	3	3	3	4	3	4
1	5	3	2	5	3	4	4	3	3	3	3	2	2	5	5	5	3	3	3	4	4	4	3	3	3	1	3	2	3	5	5	3	3	3
1	2	3	2	3	5	4	5	5	5	5	4	2	2	5	5	5	5	3	3	3	3	3	3	4	5	3	4	3	1	4	4	5	5	5
2	3	3	2	3	4	4	3	2	2	3	3	1	1	4	4	5	3	3	4	4	2	3	3	2	4	4	4	3	4	4	4	4	3	4
1	4	2	2	4	3	3	3	3	3	3	3	2	2	3	3	3	3	3	3	3	3	3	3	3	3	2	2	2	3	3	3	3	3	3
1	3	3	2	4	3	2	3	4	3	4	4	2	3	4	4	5	4	5	4	5	4	4	4	4	5	4	4	4	4	4	4	2	2	2
1	2	3	2	4	3	2	3	1	1	3	4	1	1	3	3	3	3	5	4	4	4	4	2	4	5	1	1	1	2	2	2	2	2	2
1	2	3	2	2	5	5	5	5	5	5	5	2	3	5	5	5	5	5	5	5	5	5	5	5	5	4	4	5	5	5	5	5	5	5
1	5	3	1	5	4	4	4	4	3	2	5	1	1	5	4	3	5	4	3	3	3	3	3	4	5	3	3	4	3	3	4	4	4	4
1	4	3	2	5	3	4	5	5	3	4	4	2	3	5	5	5	5	5	4	4	2	3	5	4	5	5	5	4	5	5	5	4	4	4
2	2	3	2	2	5	5	5	5	5	5	5	5	3	5	5	5	5	5	5	5	5	5	3	5	5	5	5	5	5	5	5	4	4	4
1	3	3	2	4	3	3	4	4	4	4	4	1	3	3	3	4	4	4	4	4	4	4	4	4	4	3	2	4	4	3	4	4	3	4
1	3	3	2	4	3	4	5	4	4	5	5	2	3	5	5	5	5	4	4	4	4	4	3	4	5	5	5	5	5	5	5	4	3	4
2	4	3	1	2	5	5	5	5	5	5	5	5	5	5	5	5	5	5	5	5	5	5	5	5	5	5	5	5	5	5	5	5	5	5
1	2	2	2	3	3	2	2	4	3	4	4	3	4	5	5	5	4	5	5	5	5	5	5	5	5	4	4	5	3	3	3	5	5	4
2	2	2	1	2	5	5	5	5	5	5	5	5	5	5	2	5	5	5	5	5	5	5	5	5	5	5	5	5	5	5	5	5	5	5
1	2	2	2	4	5	4	5	5	5	5	5	5	5	4	5	5	5	4	5	5	5	5	5	4	4	5	5	5	3	4	4	5	5	5
2	3	3	2	3	3	3	3	3	3	3	4	1	1	1	5	5	5	5	2	3	4	5	1	3	5	5	5	1	1	3	3	5	5	5
2	3	2	1	1	3	4	3	5	5	5	5	4	5	5	5	5	4	3	5	5	5	5	5	5	5	5	5	5	5	5	5	5	5	4
2	2	2	1	2	4	4	4	5	5	5	5	5	5	4	4	5	5	5	4	4	4	4	4	5	5	4	4	5	4	4	4	4	4	4
2	2	2	2	1	4	2	3	5	5	5	5	3	3	5	5	5	5	3	5	5	5	5	5	5	5	5	5	4	5	5	5	3	3	5
1	3	2	2	3	5	4	4	3	3	3	3	5	5	3	3	3	3	5	3	4	4	4	5	5	3	3	5	3	4	4	3	4	5	5
2	3	2	2	4	2	2	4	3	3	3	4	2	4	3	3	3	3	3	4	2	3	3	3	3	4	3	4	3	3	3	3	3	3	3
1	2	2	2	2	5	5	3	3	3	3	3	5	5	3	3	3	2	3	3	3	3	3	3	3	3	3	3	3	3	2	3	5	3	3
2	2	2	2	2	5	3	4	5	5	5	5	3	3	5	4	5	4	4	5	4	4	5	5	5	5	4	4	4	4	4	4	5	4	4
1	2	2	1	1	3	3	3	3	3	3	3	3	3	3	3	3	3	3	3	3	3	3	3	3	3	3	3	3	3	3	3	3	3	3
2	2	2	2	2	4	3	4	5	5	5	5	3	4	4	5	4	5	5	5	5	5	5	5	5	4	4	4	4	4	4	4	4	4	4
2	1	2	2	3	3	3	4	3	3	3	3	3	3	3	3	3	3	3	3	3	3	3	3	3	3	2	4	3	3	3	3	3	3	3
2	4	2	2	3	3	3	3	3	3	3	3	3	3	3	3	3	3	3	3	3	3	3	3	3	3	3	3	3	3	3	3	3	3	3
2	3	3	1	4	4	4	3	5	5	5	5	3	4	5	5	4	5	3	5	5	5	5	5	5	5	5	5	5	5	5	5	4	4	4
2	2	2	1	2	4	4	5	5	5	5	3	3	3	3	5	5	5	4	4	4	3	3	3	5	5	3	3	3	4	4	4	5	5	5
1	2	2	2	2	5	5	5	5	5	5	5	5	5	5	5	5	5	5	5	5	5	5	5	5	5	4	5	5	5	5	5	5	5	5
2	1	1	2	1	4	4	4	5	5	5	5	3	5	5	5	5	5	5	5	4	4	5	5	5	5	5	4	5	3	2	3	4	4	4
2	5	2	2	5	3	4	4	4	4	4	4	4	4	4	4	5	4	4	4	4	4	4	4	4	4	4	4	4	4	4	4	4	4	4
2	1	2	2	1	4	5	4	4	4	4	3	5	5	4	4	5	4	4	5	4	5	5	5	5	4	5	5	4	2	2	2	5	5	5
2	1	1	1	1	5	5	5	5	5	5	5	1	3	5	5	5	5	5	5	5	5	5	5	5	5	3	4	5	3	3	3	5	5	5
2	2	2	2	1	4	3	4	4	4	4	4	4	4	2	4	4	5	4	5	5	5	5	3	3	3	4	4	4	4	4	4	4	4	4
1	2	2	1	2	5	4	3	4	4	4	4	3	5	3	5	5	4	3	4	4	4	4	3	3	3	4	4	4	3	3	3	4	4	4
2	2	2	2	2	3	2	3	5	5	5	5	3	3	5	5	5	5	4	3	3	4	4	5	5	5	5	5	3	3	3	3	5	4	4
2	2	2	2	2	3	3	3	3	3	3	3	3	3	3	3	3	3	3	3	3	3	3	3	3	3	3	3	3	3	3	3	3	3	3
2	2	2	1	2	4	4	4	5	5	5	5	4	4	5	5	5	2	3	4	4	4	4	3	4	4	4	4	3	4	4	4	4	4	4
2	2	2	1	2	4	4	4	5	5	5	5	2	2	3	4	4	3	4	3	3	3	3	4	3	3	4	3	3	3	2	3	4	5	4
2	2	2	1	1	4	3	4	3	3	5	5	2	2	4	5	4	4	5	1	1	1	1	4	4	1	4	4	3	1	1	1	4	4	4
2	2	2	2	3	4	3	4	5	4	4	4	4	4	5	5	5	4	4	4	4	4	4	4	5	4	5	5	5	4	4	3	5	4	4
1	3	2	2	3	2	3	3	4	4	4	4	3	5	3	3	3	4	3	4	3	3	3	5	5	5	4	4	2	3	3	3	4	4	4
1	2	2	2	2	5	3	5	5	5	5	5	5	5	5	5	5	5	5	5	5	5	5	5	5	5	5	5	5	5	5	5	5	5	5
2	2	2	2	2	5	5	4	5	5	5	5	3	4	5	5	5	5	5	5	5	5	5	5	3	5	5	5	5	1	1	1	5	5	5
1	3	1	2	3	3	3	4	5	5	5	5	4	4	1	3	5	5	4	5	5	5	5	4	4	4	4	4	4	5	5	5	4	4	4
2	2	2	2	2	4	4	4	5	5	5	5	4	4	5	5	5	2	3	5	5	5	5	5	5	3	4	4	4	5	5	5	4	4	4
1	4	3	1	5	4	4	4	4	4	4	3	3	3	4	4	4	3	3	3	3	3	3	4	4	4	4	4	4	4	4	4	4	4	4
2	2	2	1	3	3	4	5	5	5	4	5	5	5	5	5	5	5	5	5	5	5	5	5	5	5	5	5	4	4	5	5	5	5	5
2	4	2	2	4	2	3	3	5	4	4	4	4	3	3	3	4	4	4	4	3	4	5	4	4	3	4	4	4	4	4	4	3	3	3
1	2	2	2	3	4	3	4	5	5	5	5	4	5	5	5	5	1	5	5	5	5	5	5	5	5	5	5	5	5	5	5	5	4	4
2	4	2	2	5	4	4	4	3	3	3	3	4	4	2	2	2	2	2	2	2	2	2	4	4	3	3	3	3	3	3	3	4	4	4
1	3	3	1	2	4	4	3	4	4	4	4	4	4	4	2	2	4	2	4	4	4	4	4	4	4	4	4	4	4	4	4	4	4	4
2	2	2	2	2	4	4	2	3	4	3	3	3	1	2	2	3	1	1	4	3	4	4	4	3	2	4	4	3	2	3	2	5	5	4
1	3	2	2	3	3	3	3	5	5	5	5	4	3	5	5	5	5	5	4	4	4	4	5	5	5	5	5	5	4	5	4	5	5	4
2	2	2	2	3	4	4	5	5	5	5	5	4	5	4	4	4	3	4	4	3	3	3	5	5	5	5	5	4	3	5	5	5	4	4
2	4	3	1	5	3	3	3	4	4	4	4	4	3	3	4	4	4	3	4	4	4	4	4	4	4	4	4	4	4	4	4	4	4	4
2	2	2	1	2	3	3	3	4	4	4	4	3	5	4	4	4	3	3	3	4	3	3	3	4	4	4	4	3	3	3	3	4	4	4
1	3	2	2	3	3	3	3	3	3	3	3	3	3	3	3	3	3	3	3	3	3	3	3	3	3	3	3	3	3	3	3	3	3	3
2	2	2	2	3	5	5	5	5	5	4	4	5	5	5	5	5	5	4	5	5	5	5	4	4	5	3	4	5	5	5	5	4	4	5
2	5	2	2	5	3	3	3	3	3	3	3	3	3	3	3	3	3	3	3	3	3	3	3	3	3	3	3	3	3	3	3	3	3	3
1	3	2	2	3	5	5	5	5	5	5	5	5	5	5	5	5	5	5	5	5	5	5	5	5	5	5	5	5	5	5	5	5	5	5
1	4	2	2	2	4	4	4	4	4	4	4	4	4	4	4	4	4	4	4	4	4	4	4	4	4	4	4	4	4	4	4	4	4	4
1	2	2	1	3	2	2	2	4	4	5	4	4	4	4	4	4	3	4	4	4	4	4	4	4	4	4	4	4	4	4	4	4	4	4
2	5	3	1	5	4	4	3	4	4	4	4	3	3	3	4	4	4	4	4	4	4	4	3	3	4	4	4	3	2	2	2	3	3	3
2	3	2	1	4	4	3	4	4	4	4	4	4	4	4	4	4	2	4	4	4	4	4	4	4	3	4	4	4	4	4	4	4	4	4
2	3	1	2	2	5	5	5	5	5	5	5	5	5	5	5	5	5	5	5	5	5	5	5	5	5	5	5	5	5	5	5	5	5	5
2	2	2	2	4	3	3	4	5	5	5	5	5	5	5	5	5	5	5	5	5	5	5	5	5	5	4	4	5	5	5	5	4	4	4
1	4	3	1	5	3	3	3	3	3	3	3	3	3	3	3	3	3	3	3	3	3	3	3	3	3	3	3	3	3	3	3	3	3	3
2	3	2	1	4	5	5	5	5	5	5	5	5	5	5	3	3	3	5	5	5	5	5	5	5	5	5	5	2	5	5	5	5	5	5
1	5	3	1	5	3	3	4	3	2	2	2	3	2	2	2	2	4	3	2	2	2	2	2	3	2	3	3	4	2	2	4	2	3	3
2	4	3	1	5	3	2	2	3	3	1	1	1	1	1	1	1	5	1	1	1	1	1	1	2	1	1	1	1	1	1	1	1	1	1
1	2	2	2	3	4	4	4	5	5	5	5	4	4	5	5	5	5	5	5	5	5	5	5	5	5	4	4	4	4	4	4	5	4	4
1	2	2	1	3	4	3	4	4	4	4	3	3	5	5	5	5	3	3	4	4	4	4	5	5	4	5	5	4	5	4	5	4	4	4
1	2	2	2	2	4	4	4	5	5	5	5	3	4	5	5	5	5	5	4	4	3	3	5	5	5	4	4	3	4	4	4	5	5	5
1	2	2	2	3	2	3	5	2	4	5	4	5	4	5	4	3	3	4	2	1	4	5	5	3	4	3	3	2	3	4	4	3	5	4
2	3	3	1	2	5	5	5	5	5	5	5	5	5	5	5	5	5	5	5	5	5	5	5	5	5	5	5	5	5	5	5	5	5	5
2	5	3	1	5	3	4	4	4	4	4	4	4	4	1	4	5	4	2	4	5	4	4	3	4	4	2	2	1	1	1	1	3	3	3
2	2	3	1	2	3	2	4	5	5	5	5	4	4	5	5	5	5	5	5	5	5	5	5	5	5	5	5	5	5	5	5	5	5	5
2	3	2	1	3	4	3	4	4	4	4	3	4	4	4	4	4	4	4	4	4	4	3	3	4	4	4	4	3	4	3	3	4	4	3
2	5	2	2	5	4	4	4	5	5	5	5	3	3	5	5	5	5	5	5	5	5	5	5	5	5	5	5	4	4	4	4	4	4	4
1	2	2	1	3	3	3	4	5	5	5	5	5	5	5	5	5	5	4	5	5	5	5	5	5	5	5	5	5	5	5	5	5	5	5
2	3	2	2	4	1	3	2	1	1	2	1	3	2	1	1	1	1	1	5	5	5	5	1	1	1	2	2	1	1	5	5	1	1	2
1	4	3	1	5	4	4	4	5	5	5	5	5	5	5	5	5	2	5	5	5	4	5	5	5	5	5	5	5	5	5	5	5	5	5
1	3	3	1	4	4	4	4	5	5	5	5	5	5	4	4	4	5	5	4	4	4	4	4	4	4	5	5	5	5	5	5	5	5	5
2	2	2	2	2	5	3	3	4	4	3	3	2	2	2	3	3	4	4	3	3	3	3	3	3	3	2	2	2	2	2	2	3	3	3
1	2	2	1	2	2	3	3	5	5	5	5	3	4	5	5	5	5	3	3	3	3	3	5	5	5	4	4	4	3	3	3	4	3	3
2	2	2	1	2	4	4	4	4	4	4	4	4	4	4	4	4	4	4	4	4	4	4	4	4	4	4	4	4	4	4	4	4	4	4
1	3	2	1	3	4	4	4	4	4	4	4	4	4	4	4	4	4	4	4	4	4	4	4	4	4	4	4	4	4	4	4	4	4	4
2	4	3	1	5	5	5	4	3	3	3	3	3	3	4	1	1	5	4	4	4	4	4	4	4	4	3	3	3	3	3	3	4	4	4
1	3	2	1	3	3	3	3	4	4	4	4	4	4	3	3	3	1	2	4	3	3	3	4	4	3	4	4	4	3	4	4	3	4	4
2	3	2	2	5	2	3	4	1	1	2	1	1	1	2	3	3	2	2	2	1	2	1	1	1	2	2	1	3	2	1	1	1	2	2
1	4	2	2	3	4	5	4	5	5	5	5	2	4	5	4	4	5	5	4	4	4	4	5	5	5	4	4	3	5	5	5	5	4	4
2	2	2	1	2	2	4	4	4	4	4	4	4	4	4	4	4	4	4	4	4	4	4	4	4	4	4	4	4	4	4	4	4	4	4
1	4	3	1	5	5	5	5	5	5	5	5	3	4	5	5	5	4	5	5	5	5	5	5	5	5	5	5	5	5	5	5	5	5	5
1	2	2	1	2	4	4	4	4	4	5	5	3	4	5	5	5	5	5	4	4	4	4	4	4	4	5	5	4	4	4	4	4	4	4
1	2	2	2	4	4	2	4	5	5	5	5	5	5	5	5	5	5	5	5	5	5	5	5	5	5	5	5	5	5	5	5	4	5	5
2	3	2	1	3	3	3	4	5	5	5	4	1	3	5	5	5	1	4	5	5	3	5	5	5	5	5	5	3	4	5	5	5	5	5
2	2	2	1	2	5	5	4	5	5	5	5	2	2	5	5	5	4	5	5	5	5	5	5	5	5	4	4	5	5	5	5	4	4	4
1	4	3	1	5	4	4	4	4	4	5	4	5	5	5	5	5	1	4	5	5	5	5	5	5	5	5	5	5	5	5	5	4	4	4
2	2	3	1	4	5	5	5	5	5	5	5	5	5	5	5	5	5	5	5	5	5	5	5	5	5	5	5	5	5	5	5	5	5	5
1	4	2	1	5	3	3	3	3	3	5	5	1	3	5	5	5	5	5	3	3	3	3	5	5	5	4	4	3	3	3	3	5	5	5
1	4	3	1	5	5	5	4	3	3	3	3	3	3	3	3	3	3	3	3	3	3	3	3	3	3	3	3	3	3	3	3	3	3	3
2	4	2	2	5	3	3	3	3	3	3	3	3	3	3	3	3	3	3	3	3	3	3	3	3	3	3	3	3	2	2	2	3	3	3
2	2	2	1	2	3	3	3	2	2	2	3	4	4	3	3	3	3	3	3	3	3	3	5	5	5	3	3	3	3	3	3	5	5	5
2	2	2	1	3	3	3	3	4	4	5	5	5	5	3	4	4	3	3	3	3	3	3	4	4	3	4	4	3	4	5	5	4	3	4
1	2	2	2	3	5	5	5	5	5	5	5	3	5	5	5	5	3	5	5	5	5	5	5	5	5	5	5	5	5	5	5	5	5	5
1	3	2	2	3	3	2	4	3	3	5	4	4	4	4	4	5	5	4	3	3	3	4	5	4	3	4	4	2	4	4	4	5	4	4
1	2	2	1	2	3	3	3	3	3	3	4	2	5	4	4	4	3	2	4	4	4	4	3	3	3	4	4	3	3	3	3	4	4	4
1	3	3	1	4	5	5	5	5	5	5	5	5	5	5	5	5	2	5	5	5	5	5	5	5	5	5	5	4	4	5	5	5	5	5
2	2	2	1	2	3	3	4	5	5	5	4	2	2	4	4	4	4	3	3	3	4	3	4	4	3	4	4	4	3	4	3	4	4	4
2	2	3	1	2	5	3	4	4	4	4	4	3	4	5	5	3	4	5	3	5	5	5	5	5	5	5	5	4	4	4	4	4	4	4
2	3	2	2	4	3	3	4	5	5	5	5	4	4	4	4	4	3	4	4	4	4	4	4	4	4	3	3	3	5	5	5	4	4	4
1	2	2	2	3	4	4	4	5	5	5	5	3	4	4	4	4	3	3	3	3	3	3	4	4	4	5	5	5	4	5	5	4	4	4
2	3	2	2	4	5	4	5	5	5	5	5	4	5	5	5	5	5	5	5	5	4	4	5	5	4	4	4	5	5	5	5	5	5	5
2	2	2	1	2	5	3	3	1	1	1	2	4	5	1	1	1	5	1	2	3	1	2	2	1	1	4	3	3	1	1	1	3	4	3
2	2	2	2	4	1	3	3	3	3	1	3	1	1	3	3	3	1	3	4	3	2	3	3	3	3	2	4	4	3	3	3	3	2	3
2	3	2	2	3	4	4	4	5	5	5	5	4	4	5	3	1	5	5	5	5	5	5	5	5	5	5	5	5	5	5	4	4	4	4
1	4	2	2	5	2	3	2	2	2	2	2	2	3	2	2	2	2	2	2	2	2	2	3	2	2	2	2	2	2	3	2	2	2	2
1	2	2	2	3	3	3	3	3	3	3	3	3	3	4	4	4	3	3	3	3	3	3	4	3	4	2	3	3	4	4	4	3	3	3
2	3	2	2	3	4	4	4	4	4	4	4	3	4	4	4	4	4	4	4	4	4	4	4	4	4	4	4	4	4	4	4	4	4	4
2	2	3	1	3	4	5	5	5	5	5	5	2	1	5	5	5	5	4	5	5	5	5	5	3	5	5	5	5	5	5	5	5	5	5
2	3	2	2	3	4	4	5	5	4	5	4	4	5	4	5	5	4	4	4	5	4	4	4	4	5	4	4	4	3	3	3	4	5	4
1	2	2	1	3	2	2	2	4	4	4	4	5	4	5	5	5	3	3	4	4	5	4	4	5	4	5	4	4	5	5	5	4	3	3
2	3	2	2	4	3	3	2	4	4	5	5	3	4	3	3	4	5	2	3	3	3	3	3	3	3	4	4	3	5	4	4	3	3	3
2	4	2	2	4	4	4	4	2	2	2	2	3	3	1	4	4	2	3	3	3	3	3	2	3	3	3	3	3	3	3	3	4	4	4
1	2	2	1	3	3	2	5	3	5	5	4	1	1	2	5	5	5	5	3	3	3	3	3	3	5	5	5	1	5	3	4	4	3	5
2	3	2	1	4	5	5	5	5	5	5	5	5	5	5	5	5	4	3	5	5	5	5	5	5	5	5	5	5	5	5	5	5	5	5
1	2	2	1	3	4	4	5	5	5	5	5	4	5	5	5	5	5	3	5	4	4	4	4	5	5	4	4	4	5	5	5	5	5	5
2	2	2	2	2	2	2	3	5	5	4	5	2	3	1	3	3	1	4	4	4	4	4	4	5	4	3	3	2	4	4	4	4	4	4
2	2	2	1	2	3	3	4	4	4	4	4	3	3	2	3	3	4	3	4	4	4	5	3	3	2	3	3	3	4	4	4	4	3	4
1	2	4	2	2	1	5	5	5	5	5	5	4	4	5	5	5	4	5	5	5	5	5	5	5	5	3	4	4	4	5	5	5	5	5
1	2	2	2	2	3	3	3	3	3	3	3	3	3	3	3	3	3	3	3	3	3	3	3	3	3	3	3	3	3	3	3	3	3	3
2	2	2	2	3	4	5	5	5	5	5	5	5	5	5	5	5	5	5	5	5	5	5	5	5	5	5	5	4	5	5	5	5	5	5
2	3	2	1	2	4	4	4	4	4	4	4	2	2	4	4	4	4	4	4	4	4	4	4	4	4	4	4	4	4	4	4	4	4	4
1	3	2	1	3	3	2	4	4	4	4	5	4	4	2	3	4	5	5	4	4	4	4	3	3	3	3	3	3	3	3	3	4	3	4
2	4	4	2	2	3	3	3	3	5	5	5	5	5	4	4	4	5	5	4	4	4	4	4	4	4	4	4	5	3	3	3	4	4	4
1	3	2	2	2	4	2	4	3	3	3	3	2	2	3	3	3	3	3	3	3	3	3	3	3	3	3	3	3	3	3	3	3	3	3
1	3	2	2	4	3	3	3	3	3	3	3	3	3	2	2	2	3	3	3	3	3	3	3	3	3	4	4	2	3	3	3	3	3	3
1	3	2	1	4	4	4	4	4	4	4	5	3	3	4	5	5	4	4	4	4	4	4	2	3	4	4	4	4	4	4	4	4	3	4
2	2	2	2	4	4	4	4	5	5	5	5	3	3	5	3	3	5	5	5	5	5	5	4	4	5	5	5	4	4	5	5	4	4	4
1	2	2	2	2	4	4	4	5	5	5	5	5	5	5	3	1	5	4	5	5	5	5	5	5	5	4	4	4	5	5	5	4	4	4
2	4	3	1	3	3	3	3	4	4	4	4	4	4	4	4	4	4	4	4	4	4	4	4	4	4	4	4	4	4	4	4	4	4	4
2	3	3	1	3	4	4	4	5	4	4	4	4	4	1	2	3	4	2	4	4	4	4	2	3	2	4	4	4	1	1	3	4	4	4
1	2	2	1	3	3	4	4	5	5	5	5	3	5	5	1	1	1	5	4	4	4	4	4	4	5	5	5	5	4	4	4	5	5	5
1	4	3	1	5	4	4	4	5	5	5	5	4	4	5	5	5	5	4	5	5	5	5	5	4	5	5	5	5	5	5	5	5	5	5
1	3	3	1	2	3	4	4	4	4	4	5	4	4	5	3	3	5	4	3	3	3	3	4	4	4	4	4	4	4	4	4	4	4	4
2	2	3	1	3	4	3	3	4	4	4	5	4	4	5	5	5	5	4	4	4	4	4	4	4	4	4	4	4	4	4	4	4	4	4
2	3	2	1	3	3	4	4	3	3	3	3	3	2	2	2	2	3	3	3	3	3	3	3	3	3	3	3	3	3	3	3	4	4	3
1	2	2	2	3	3	4	4	5	5	5	5	5	3	5	4	5	4	3	4	5	4	5	4	3	4	3	3	4	4	4	4	4	4	3
2	2	2	2	3	4	3	4	4	4	4	4	4	5	4	4	3	4	4	4	4	5	5	5	4	5	3	4	3	3	3	3	4	4	4

## Sheet: With likert code
Gender	Income	Education	Chabot Access	Reason	HEDstrongly disagree	HEDDisagree	HEDNeutral	FACstrongly disagree	FACDisagree	FACNeutral	FACAgree	SOCstrongly disagree	SOCDisagree	PERstrongly disagree	PERDisagree	PERNeutral	EFFstrongly disagree	EFFDisagree	CONstrongly disagree	CONDisagree	CONNeutral	CONAgree	SATstrongly disagree	SATDisagree	SATNeutral	COTstrongly disagree	COTDisagree	COTNeutral	HPUstrongly disagree	HPUDisagree	HPUNeutral	SECstrongly disagree	SECDisagree	SECNeutral
1 = "Male";2 = "Female"	1 = "Prefer not to say";2 = "Less than 16,000 SAR";3 = "Between 16,000 SAR and 26,000 SAR";4 = "More than 26,000 SAR";5 = "Do Not Know"	1 = "High school";2 = "Bachelor’s Degree";3 = "Master";4 = "Doctorate"	1 = "From PC";2 = "From Smart Phone/Tablet"	1 = "To schedule appointments";2 = "To get prescription refill";3 = "To get medical Assistant";4 = "To get information about disease prevention";5 = "To inquiry about insurance claims"	Using healthcare chatbot application is fun.	Using healthcare chatbot application is pleasant	Using healthcare chatbot application is enjoyable and fascinating	I have the resources necessary to use the healthcare chatbot applications.	I have the knowledge necessary to use healthcare chatbot applications.	My computer is compatible with the healthcare chatbot applications.	A specific group is available for assistance with difficulties associated with the healthcare chatbot applications.	People who are important to me think that I should use healthcare chatbot applications for my healthcare services.	People who influence my behaviors recommend that I use healthcare chatbot applications	The healthcare chatbot gives me the right answers.	The healthcare chatbot understands complex conversation.	The healthcare chatbot performance is equal to humans.	The healthcare chatbot is easy to use.	Learning to use healthcare chatbot is easy.	My experience with using the healthcare chatbot application was better than I expected	The service level provided by the healthcare chatbot application was better than I expected	The healthcare chatbot applications can meet demands in excess of what I required for the service.	Overall, most of my expectations from using the healthcare chatbot applications were confirmed.	I am satisfied with my decision to use healthcare chatbot.	My decision to use the healthcare chatbot application was a wise one.	I am happy with my earlier decision to use healthcare chatbot application	I intend to continue using healthcare chatbot application rather than discontinue its use.	I intend to continue using healthcare chatbot applications rather than other alternative means.	If I could, I would like to sustain my use of healthcare chatbot applications for my healthcare services.	I perceive that this chatbot is friendly to me during the conversation	The chatbot gave some smart suggestions based on my responses.	I feel this chatbot is sociable	I feel secure in providing sensitive information to chatbot.	The information that chatbot has about me is protected.	I trust that my personal information with chatbot application will not be misused.
1	3	3	1	3	strongly Agree	Neutral	Neutral	Agree	Agree	Neutral	Agree	Neutral	Neutral	strongly Agree	Agree	strongly Agree	strongly Agree	Agree	strongly Agree	strongly Agree	strongly Agree	strongly Agree	Agree	strongly Agree	strongly Agree	Neutral	Neutral	Neutral	Neutral	Neutral	Disagree	Agree	strongly Agree	Agree
1	3	3	1	2	Agree	strongly Agree	Disagree	strongly Agree	Disagree	Agree	strongly Agree	Agree	Neutral	Agree	Agree	Agree	Neutral	Agree	Neutral	Agree	Agree	strongly disagree	Agree	Neutral	Neutral	Agree	Agree	strongly Agree	Agree	Agree	Neutral	Agree	strongly disagree	strongly Agree
1	5	3	2	5	strongly Agree	strongly Agree	strongly Agree	strongly disagree	strongly disagree	strongly Agree	strongly Agree	Disagree	Neutral	strongly Agree	strongly Agree	strongly Agree	strongly Agree	strongly Agree	strongly Agree	strongly Agree	strongly Agree	strongly Agree	strongly Agree	strongly Agree	strongly Agree	strongly Agree	strongly Agree	strongly Agree	strongly Agree	strongly Agree	strongly Agree	strongly Agree	Agree	strongly Agree
1	3	3	2	2	Agree	Agree	Agree	Agree	Agree	Agree	Agree	Neutral	Neutral	strongly Agree	strongly Agree	strongly Agree	Agree	Agree	Agree	Agree	Neutral	Neutral	Agree	Neutral	Agree	Agree	Agree	Agree	Agree	Agree	Agree	Agree	Agree	Agree
2	4	3	2	4	Agree	Agree	strongly Agree	Agree	strongly disagree	Agree	Agree	Disagree	Neutral	strongly disagree	strongly disagree	Agree	Agree	Disagree	strongly disagree	Neutral	Disagree	Agree	Disagree	Disagree	strongly Agree	Disagree	Neutral	Neutral	Agree	Neutral	strongly Agree	Agree	Agree	Disagree
1	2	3	2	4	Agree	Agree	Neutral	Neutral	Neutral	Agree	Agree	Disagree	Neutral	Agree	Agree	Agree	Agree	Agree	Agree	Agree	Agree	Agree	Agree	Agree	Agree	Agree	Neutral	Agree	Neutral	Neutral	Neutral	Agree	Neutral	Agree
1	5	3	2	5	Neutral	Agree	Agree	Neutral	Neutral	Neutral	Neutral	Disagree	Disagree	strongly Agree	strongly Agree	strongly Agree	Neutral	Neutral	Neutral	Agree	Agree	Agree	Neutral	Neutral	Neutral	strongly disagree	Neutral	Disagree	Neutral	strongly Agree	strongly Agree	Neutral	Neutral	Neutral
1	2	3	2	3	strongly Agree	Agree	strongly Agree	strongly Agree	strongly Agree	strongly Agree	Agree	Disagree	Disagree	strongly Agree	strongly Agree	strongly Agree	strongly Agree	Neutral	Neutral	Neutral	Neutral	Neutral	Neutral	Agree	strongly Agree	Neutral	Agree	Neutral	strongly disagree	Agree	Agree	strongly Agree	strongly Agree	strongly Agree
2	3	3	2	3	Agree	Agree	Neutral	Disagree	Disagree	Neutral	Neutral	strongly disagree	strongly disagree	Agree	Agree	strongly Agree	Neutral	Neutral	Agree	Agree	Disagree	Neutral	Neutral	Disagree	Agree	Agree	Agree	Neutral	Agree	Agree	Agree	Agree	Neutral	Agree
1	4	2	2	4	Neutral	Neutral	Neutral	Neutral	Neutral	Neutral	Neutral	Disagree	Disagree	Neutral	Neutral	Neutral	Neutral	Neutral	Neutral	Neutral	Neutral	Neutral	Neutral	Neutral	Neutral	Disagree	Disagree	Disagree	Neutral	Neutral	Neutral	Neutral	Neutral	Neutral
1	3	3	2	4	Neutral	Disagree	Neutral	Agree	Neutral	Agree	Agree	Disagree	Neutral	Agree	Agree	strongly Agree	Agree	strongly Agree	Agree	strongly Agree	Agree	Agree	Agree	Agree	strongly Agree	Agree	Agree	Agree	Agree	Agree	Agree	Disagree	Disagree	Disagree
1	2	3	2	4	Neutral	Disagree	Neutral	strongly disagree	strongly disagree	Neutral	Agree	strongly disagree	strongly disagree	Neutral	Neutral	Neutral	Neutral	strongly Agree	Agree	Agree	Agree	Agree	Disagree	Agree	strongly Agree	strongly disagree	strongly disagree	strongly disagree	Disagree	Disagree	Disagree	Disagree	Disagree	Disagree
1	2	3	2	2	strongly Agree	strongly Agree	strongly Agree	strongly Agree	strongly Agree	strongly Agree	strongly Agree	Disagree	Neutral	strongly Agree	strongly Agree	strongly Agree	strongly Agree	strongly Agree	strongly Agree	strongly Agree	strongly Agree	strongly Agree	strongly Agree	strongly Agree	strongly Agree	Agree	Agree	strongly Agree	strongly Agree	strongly Agree	strongly Agree	strongly Agree	strongly Agree	strongly Agree
1	5	3	1	5	Agree	Agree	Agree	Agree	Neutral	Disagree	strongly Agree	strongly disagree	strongly disagree	strongly Agree	Agree	Neutral	strongly Agree	Agree	Neutral	Neutral	Neutral	Neutral	Neutral	Agree	strongly Agree	Neutral	Neutral	Agree	Neutral	Neutral	Agree	Agree	Agree	Agree
1	4	3	2	5	Neutral	Agree	strongly Agree	strongly Agree	Neutral	Agree	Agree	Disagree	Neutral	strongly Agree	strongly Agree	strongly Agree	strongly Agree	strongly Agree	Agree	Agree	Disagree	Neutral	strongly Agree	Agree	strongly Agree	strongly Agree	strongly Agree	Agree	strongly Agree	strongly Agree	strongly Agree	Agree	Agree	Agree
2	2	3	2	2	strongly Agree	strongly Agree	strongly Agree	strongly Agree	strongly Agree	strongly Agree	strongly Agree	strongly Agree	Neutral	strongly Agree	strongly Agree	strongly Agree	strongly Agree	strongly Agree	strongly Agree	strongly Agree	strongly Agree	strongly Agree	Neutral	strongly Agree	strongly Agree	strongly Agree	strongly Agree	strongly Agree	strongly Agree	strongly Agree	strongly Agree	Agree	Agree	Agree
1	3	3	2	4	Neutral	Neutral	Agree	Agree	Agree	Agree	Agree	strongly disagree	Neutral	Neutral	Neutral	Agree	Agree	Agree	Agree	Agree	Agree	Agree	Agree	Agree	Agree	Neutral	Disagree	Agree	Agree	Neutral	Agree	Agree	Neutral	Agree
1	3	3	2	4	Neutral	Agree	strongly Agree	Agree	Agree	strongly Agree	strongly Agree	Disagree	Neutral	strongly Agree	strongly Agree	strongly Agree	strongly Agree	Agree	Agree	Agree	Agree	Agree	Neutral	Agree	strongly Agree	strongly Agree	strongly Agree	strongly Agree	strongly Agree	strongly Agree	strongly Agree	Agree	Neutral	Agree
2	4	3	1	2	strongly Agree	strongly Agree	strongly Agree	strongly Agree	strongly Agree	strongly Agree	strongly Agree	strongly Agree	strongly Agree	strongly Agree	strongly Agree	strongly Agree	strongly Agree	strongly Agree	strongly Agree	strongly Agree	strongly Agree	strongly Agree	strongly Agree	strongly Agree	strongly Agree	strongly Agree	strongly Agree	strongly Agree	strongly Agree	strongly Agree	strongly Agree	strongly Agree	strongly Agree	strongly Agree
1	2	2	2	3	Neutral	Disagree	Disagree	Agree	Neutral	Agree	Agree	Neutral	Agree	strongly Agree	strongly Agree	strongly Agree	Agree	strongly Agree	strongly Agree	strongly Agree	strongly Agree	strongly Agree	strongly Agree	strongly Agree	strongly Agree	Agree	Agree	strongly Agree	Neutral	Neutral	Neutral	strongly Agree	strongly Agree	Agree
2	2	2	1	2	strongly Agree	strongly Agree	strongly Agree	strongly Agree	strongly Agree	strongly Agree	strongly Agree	strongly Agree	strongly Agree	strongly Agree	Disagree	strongly Agree	strongly Agree	strongly Agree	strongly Agree	strongly Agree	strongly Agree	strongly Agree	strongly Agree	strongly Agree	strongly Agree	strongly Agree	strongly Agree	strongly Agree	strongly Agree	strongly Agree	strongly Agree	strongly Agree	strongly Agree	strongly Agree
1	2	2	2	4	strongly Agree	Agree	strongly Agree	strongly Agree	strongly Agree	strongly Agree	strongly Agree	strongly Agree	strongly Agree	Agree	strongly Agree	strongly Agree	strongly Agree	Agree	strongly Agree	strongly Agree	strongly Agree	strongly Agree	strongly Agree	Agree	Agree	strongly Agree	strongly Agree	strongly Agree	Neutral	Agree	Agree	strongly Agree	strongly Agree	strongly Agree
2	3	3	2	3	Neutral	Neutral	Neutral	Neutral	Neutral	Neutral	Agree	strongly disagree	strongly disagree	strongly disagree	strongly Agree	strongly Agree	strongly Agree	strongly Agree	Disagree	Neutral	Agree	strongly Agree	strongly disagree	Neutral	strongly Agree	strongly Agree	strongly Agree	strongly disagree	strongly disagree	Neutral	Neutral	strongly Agree	strongly Agree	strongly Agree
2	3	2	1	1	Neutral	Agree	Neutral	strongly Agree	strongly Agree	strongly Agree	strongly Agree	Agree	strongly Agree	strongly Agree	strongly Agree	strongly Agree	Agree	Neutral	strongly Agree	strongly Agree	strongly Agree	strongly Agree	strongly Agree	strongly Agree	strongly Agree	strongly Agree	strongly Agree	strongly Agree	strongly Agree	strongly Agree	strongly Agree	strongly Agree	strongly Agree	Agree
2	2	2	1	2	Agree	Agree	Agree	strongly Agree	strongly Agree	strongly Agree	strongly Agree	strongly Agree	strongly Agree	Agree	Agree	strongly Agree	strongly Agree	strongly Agree	Agree	Agree	Agree	Agree	Agree	strongly Agree	strongly Agree	Agree	Agree	strongly Agree	Agree	Agree	Agree	Agree	Agree	Agree
2	2	2	2	1	Agree	Disagree	Neutral	strongly Agree	strongly Agree	strongly Agree	strongly Agree	Neutral	Neutral	strongly Agree	strongly Agree	strongly Agree	strongly Agree	Neutral	strongly Agree	strongly Agree	strongly Agree	strongly Agree	strongly Agree	strongly Agree	strongly Agree	strongly Agree	strongly Agree	Agree	strongly Agree	strongly Agree	strongly Agree	Neutral	Neutral	strongly Agree
1	3	2	2	3	strongly Agree	Agree	Agree	Neutral	Neutral	Neutral	Neutral	strongly Agree	strongly Agree	Neutral	Neutral	Neutral	Neutral	strongly Agree	Neutral	Agree	Agree	Agree	strongly Agree	strongly Agree	Neutral	Neutral	strongly Agree	Neutral	Agree	Agree	Neutral	Agree	strongly Agree	strongly Agree
2	3	2	2	4	Disagree	Disagree	Agree	Neutral	Neutral	Neutral	Agree	Disagree	Agree	Neutral	Neutral	Neutral	Neutral	Neutral	Agree	Disagree	Neutral	Neutral	Neutral	Neutral	Agree	Neutral	Agree	Neutral	Neutral	Neutral	Neutral	Neutral	Neutral	Neutral
1	2	2	2	2	strongly Agree	strongly Agree	Neutral	Neutral	Neutral	Neutral	Neutral	strongly Agree	strongly Agree	Neutral	Neutral	Neutral	Disagree	Neutral	Neutral	Neutral	Neutral	Neutral	Neutral	Neutral	Neutral	Neutral	Neutral	Neutral	Neutral	Disagree	Neutral	strongly Agree	Neutral	Neutral
2	2	2	2	2	strongly Agree	Neutral	Agree	strongly Agree	strongly Agree	strongly Agree	strongly Agree	Neutral	Neutral	strongly Agree	Agree	strongly Agree	Agree	Agree	strongly Agree	Agree	Agree	strongly Agree	strongly Agree	strongly Agree	strongly Agree	Agree	Agree	Agree	Agree	Agree	Agree	strongly Agree	Agree	Agree
1	2	2	1	1	Neutral	Neutral	Neutral	Neutral	Neutral	Neutral	Neutral	Neutral	Neutral	Neutral	Neutral	Neutral	Neutral	Neutral	Neutral	Neutral	Neutral	Neutral	Neutral	Neutral	Neutral	Neutral	Neutral	Neutral	Neutral	Neutral	Neutral	Neutral	Neutral	Neutral
2	2	2	2	2	Agree	Neutral	Agree	strongly Agree	strongly Agree	strongly Agree	strongly Agree	Neutral	Agree	Agree	strongly Agree	Agree	strongly Agree	strongly Agree	strongly Agree	strongly Agree	strongly Agree	strongly Agree	strongly Agree	strongly Agree	Agree	Agree	Agree	Agree	Agree	Agree	Agree	Agree	Agree	Agree
2	1	2	2	3	Neutral	Neutral	Agree	Neutral	Neutral	Neutral	Neutral	Neutral	Neutral	Neutral	Neutral	Neutral	Neutral	Neutral	Neutral	Neutral	Neutral	Neutral	Neutral	Neutral	Neutral	Disagree	Agree	Neutral	Neutral	Neutral	Neutral	Neutral	Neutral	Neutral
2	4	2	2	3	Neutral	Neutral	Neutral	Neutral	Neutral	Neutral	Neutral	Neutral	Neutral	Neutral	Neutral	Neutral	Neutral	Neutral	Neutral	Neutral	Neutral	Neutral	Neutral	Neutral	Neutral	Neutral	Neutral	Neutral	Neutral	Neutral	Neutral	Neutral	Neutral	Neutral
2	3	3	1	4	Agree	Agree	Neutral	strongly Agree	strongly Agree	strongly Agree	strongly Agree	Neutral	Agree	strongly Agree	strongly Agree	Agree	strongly Agree	Neutral	strongly Agree	strongly Agree	strongly Agree	strongly Agree	strongly Agree	strongly Agree	strongly Agree	strongly Agree	strongly Agree	strongly Agree	strongly Agree	strongly Agree	strongly Agree	Agree	Agree	Agree
2	2	2	1	2	Agree	Agree	strongly Agree	strongly Agree	strongly Agree	strongly Agree	Neutral	Neutral	Neutral	Neutral	strongly Agree	strongly Agree	strongly Agree	Agree	Agree	Agree	Neutral	Neutral	Neutral	strongly Agree	strongly Agree	Neutral	Neutral	Neutral	Agree	Agree	Agree	strongly Agree	strongly Agree	strongly Agree
1	2	2	2	2	strongly Agree	strongly Agree	strongly Agree	strongly Agree	strongly Agree	strongly Agree	strongly Agree	strongly Agree	strongly Agree	strongly Agree	strongly Agree	strongly Agree	strongly Agree	strongly Agree	strongly Agree	strongly Agree	strongly Agree	strongly Agree	strongly Agree	strongly Agree	strongly Agree	Agree	strongly Agree	strongly Agree	strongly Agree	strongly Agree	strongly Agree	strongly Agree	strongly Agree	strongly Agree
2	1	1	2	1	Agree	Agree	Agree	strongly Agree	strongly Agree	strongly Agree	strongly Agree	Neutral	strongly Agree	strongly Agree	strongly Agree	strongly Agree	strongly Agree	strongly Agree	strongly Agree	Agree	Agree	strongly Agree	strongly Agree	strongly Agree	strongly Agree	strongly Agree	Agree	strongly Agree	Neutral	Disagree	Neutral	Agree	Agree	Agree
2	5	2	2	5	Neutral	Agree	Agree	Agree	Agree	Agree	Agree	Agree	Agree	Agree	Agree	strongly Agree	Agree	Agree	Agree	Agree	Agree	Agree	Agree	Agree	Agree	Agree	Agree	Agree	Agree	Agree	Agree	Agree	Agree	Agree
2	1	2	2	1	Agree	strongly Agree	Agree	Agree	Agree	Agree	Neutral	strongly Agree	strongly Agree	Agree	Agree	strongly Agree	Agree	Agree	strongly Agree	Agree	strongly Agree	strongly Agree	strongly Agree	strongly Agree	Agree	strongly Agree	strongly Agree	Agree	Disagree	Disagree	Disagree	strongly Agree	strongly Agree	strongly Agree
2	1	1	1	1	strongly Agree	strongly Agree	strongly Agree	strongly Agree	strongly Agree	strongly Agree	strongly Agree	strongly disagree	Neutral	strongly Agree	strongly Agree	strongly Agree	strongly Agree	strongly Agree	strongly Agree	strongly Agree	strongly Agree	strongly Agree	strongly Agree	strongly Agree	strongly Agree	Neutral	Agree	strongly Agree	Neutral	Neutral	Neutral	strongly Agree	strongly Agree	strongly Agree
2	2	2	2	1	Agree	Neutral	Agree	Agree	Agree	Agree	Agree	Agree	Agree	Disagree	Agree	Agree	strongly Agree	Agree	strongly Agree	strongly Agree	strongly Agree	strongly Agree	Neutral	Neutral	Neutral	Agree	Agree	Agree	Agree	Agree	Agree	Agree	Agree	Agree
1	2	2	1	2	strongly Agree	Agree	Neutral	Agree	Agree	Agree	Agree	Neutral	strongly Agree	Neutral	strongly Agree	strongly Agree	Agree	Neutral	Agree	Agree	Agree	Agree	Neutral	Neutral	Neutral	Agree	Agree	Agree	Neutral	Neutral	Neutral	Agree	Agree	Agree
2	2	2	2	2	Neutral	Disagree	Neutral	strongly Agree	strongly Agree	strongly Agree	strongly Agree	Neutral	Neutral	strongly Agree	strongly Agree	strongly Agree	strongly Agree	Agree	Neutral	Neutral	Agree	Agree	strongly Agree	strongly Agree	strongly Agree	strongly Agree	strongly Agree	Neutral	Neutral	Neutral	Neutral	strongly Agree	Agree	Agree
2	2	2	2	2	Neutral	Neutral	Neutral	Neutral	Neutral	Neutral	Neutral	Neutral	Neutral	Neutral	Neutral	Neutral	Neutral	Neutral	Neutral	Neutral	Neutral	Neutral	Neutral	Neutral	Neutral	Neutral	Neutral	Neutral	Neutral	Neutral	Neutral	Neutral	Neutral	Neutral
2	2	2	1	2	Agree	Agree	Agree	strongly Agree	strongly Agree	strongly Agree	strongly Agree	Agree	Agree	strongly Agree	strongly Agree	strongly Agree	Disagree	Neutral	Agree	Agree	Agree	Agree	Neutral	Agree	Agree	Agree	Agree	Neutral	Agree	Agree	Agree	Agree	Agree	Agree
2	2	2	1	2	Agree	Agree	Agree	strongly Agree	strongly Agree	strongly Agree	strongly Agree	Disagree	Disagree	Neutral	Agree	Agree	Neutral	Agree	Neutral	Neutral	Neutral	Neutral	Agree	Neutral	Neutral	Agree	Neutral	Neutral	Neutral	Disagree	Neutral	Agree	strongly Agree	Agree
2	2	2	1	1	Agree	Neutral	Agree	Neutral	Neutral	strongly Agree	strongly Agree	Disagree	Disagree	Agree	strongly Agree	Agree	Agree	strongly Agree	strongly disagree	strongly disagree	strongly disagree	strongly disagree	Agree	Agree	strongly disagree	Agree	Agree	Neutral	strongly disagree	strongly disagree	strongly disagree	Agree	Agree	Agree
2	2	2	2	3	Agree	Neutral	Agree	strongly Agree	Agree	Agree	Agree	Agree	Agree	strongly Agree	strongly Agree	strongly Agree	Agree	Agree	Agree	Agree	Agree	Agree	Agree	strongly Agree	Agree	strongly Agree	strongly Agree	strongly Agree	Agree	Agree	Neutral	strongly Agree	Agree	Agree
1	3	2	2	3	Disagree	Neutral	Neutral	Agree	Agree	Agree	Agree	Neutral	strongly Agree	Neutral	Neutral	Neutral	Agree	Neutral	Agree	Neutral	Neutral	Neutral	strongly Agree	strongly Agree	strongly Agree	Agree	Agree	Disagree	Neutral	Neutral	Neutral	Agree	Agree	Agree
1	2	2	2	2	strongly Agree	Neutral	strongly Agree	strongly Agree	strongly Agree	strongly Agree	strongly Agree	strongly Agree	strongly Agree	strongly Agree	strongly Agree	strongly Agree	strongly Agree	strongly Agree	strongly Agree	strongly Agree	strongly Agree	strongly Agree	strongly Agree	strongly Agree	strongly Agree	strongly Agree	strongly Agree	strongly Agree	strongly Agree	strongly Agree	strongly Agree	strongly Agree	strongly Agree	strongly Agree
2	2	2	2	2	strongly Agree	strongly Agree	Agree	strongly Agree	strongly Agree	strongly Agree	strongly Agree	Neutral	Agree	strongly Agree	strongly Agree	strongly Agree	strongly Agree	strongly Agree	strongly Agree	strongly Agree	strongly Agree	strongly Agree	strongly Agree	Neutral	strongly Agree	strongly Agree	strongly Agree	strongly Agree	strongly disagree	strongly disagree	strongly disagree	strongly Agree	strongly Agree	strongly Agree
1	3	1	2	3	Neutral	Neutral	Agree	strongly Agree	strongly Agree	strongly Agree	strongly Agree	Agree	Agree	strongly disagree	Neutral	strongly Agree	strongly Agree	Agree	strongly Agree	strongly Agree	strongly Agree	strongly Agree	Agree	Agree	Agree	Agree	Agree	Agree	strongly Agree	strongly Agree	strongly Agree	Agree	Agree	Agree
2	2	2	2	2	Agree	Agree	Agree	strongly Agree	strongly Agree	strongly Agree	strongly Agree	Agree	Agree	strongly Agree	strongly Agree	strongly Agree	Disagree	Neutral	strongly Agree	strongly Agree	strongly Agree	strongly Agree	strongly Agree	strongly Agree	Neutral	Agree	Agree	Agree	strongly Agree	strongly Agree	strongly Agree	Agree	Agree	Agree
1	4	3	1	5	Agree	Agree	Agree	Agree	Agree	Agree	Neutral	Neutral	Neutral	Agree	Agree	Agree	Neutral	Neutral	Neutral	Neutral	Neutral	Neutral	Agree	Agree	Agree	Agree	Agree	Agree	Agree	Agree	Agree	Agree	Agree	Agree
2	2	2	1	3	Neutral	Agree	strongly Agree	strongly Agree	strongly Agree	Agree	strongly Agree	strongly Agree	strongly Agree	strongly Agree	strongly Agree	strongly Agree	strongly Agree	strongly Agree	strongly Agree	strongly Agree	strongly Agree	strongly Agree	strongly Agree	strongly Agree	strongly Agree	strongly Agree	strongly Agree	Agree	Agree	strongly Agree	strongly Agree	strongly Agree	strongly Agree	strongly Agree
2	4	2	2	4	Disagree	Neutral	Neutral	strongly Agree	Agree	Agree	Agree	Agree	Neutral	Neutral	Neutral	Agree	Agree	Agree	Agree	Neutral	Agree	strongly Agree	Agree	Agree	Neutral	Agree	Agree	Agree	Agree	Agree	Agree	Neutral	Neutral	Neutral
1	2	2	2	3	Agree	Neutral	Agree	strongly Agree	strongly Agree	strongly Agree	strongly Agree	Agree	strongly Agree	strongly Agree	strongly Agree	strongly Agree	strongly disagree	strongly Agree	strongly Agree	strongly Agree	strongly Agree	strongly Agree	strongly Agree	strongly Agree	strongly Agree	strongly Agree	strongly Agree	strongly Agree	strongly Agree	strongly Agree	strongly Agree	strongly Agree	Agree	Agree
2	4	2	2	5	Agree	Agree	Agree	Neutral	Neutral	Neutral	Neutral	Agree	Agree	Disagree	Disagree	Disagree	Disagree	Disagree	Disagree	Disagree	Disagree	Disagree	Agree	Agree	Neutral	Neutral	Neutral	Neutral	Neutral	Neutral	Neutral	Agree	Agree	Agree
1	3	3	1	2	Agree	Agree	Neutral	Agree	Agree	Agree	Agree	Agree	Agree	Agree	Disagree	Disagree	Agree	Disagree	Agree	Agree	Agree	Agree	Agree	Agree	Agree	Agree	Agree	Agree	Agree	Agree	Agree	Agree	Agree	Agree
2	2	2	2	2	Agree	Agree	Disagree	Neutral	Agree	Neutral	Neutral	Neutral	strongly disagree	Disagree	Disagree	Neutral	strongly disagree	strongly disagree	Agree	Neutral	Agree	Agree	Agree	Neutral	Disagree	Agree	Agree	Neutral	Disagree	Neutral	Disagree	strongly Agree	strongly Agree	Agree
1	3	2	2	3	Neutral	Neutral	Neutral	strongly Agree	strongly Agree	strongly Agree	strongly Agree	Agree	Neutral	strongly Agree	strongly Agree	strongly Agree	strongly Agree	strongly Agree	Agree	Agree	Agree	Agree	strongly Agree	strongly Agree	strongly Agree	strongly Agree	strongly Agree	strongly Agree	Agree	strongly Agree	Agree	strongly Agree	strongly Agree	Agree
2	2	2	2	3	Agree	Agree	strongly Agree	strongly Agree	strongly Agree	strongly Agree	strongly Agree	Agree	strongly Agree	Agree	Agree	Agree	Neutral	Agree	Agree	Neutral	Neutral	Neutral	strongly Agree	strongly Agree	strongly Agree	strongly Agree	strongly Agree	Agree	Neutral	strongly Agree	strongly Agree	strongly Agree	Agree	Agree
2	4	3	1	5	Neutral	Neutral	Neutral	Agree	Agree	Agree	Agree	Agree	Neutral	Neutral	Agree	Agree	Agree	Neutral	Agree	Agree	Agree	Agree	Agree	Agree	Agree	Agree	Agree	Agree	Agree	Agree	Agree	Agree	Agree	Agree
2	2	2	1	2	Neutral	Neutral	Neutral	Agree	Agree	Agree	Agree	Neutral	strongly Agree	Agree	Agree	Agree	Neutral	Neutral	Neutral	Agree	Neutral	Neutral	Neutral	Agree	Agree	Agree	Agree	Neutral	Neutral	Neutral	Neutral	Agree	Agree	Agree
1	3	2	2	3	Neutral	Neutral	Neutral	Neutral	Neutral	Neutral	Neutral	Neutral	Neutral	Neutral	Neutral	Neutral	Neutral	Neutral	Neutral	Neutral	Neutral	Neutral	Neutral	Neutral	Neutral	Neutral	Neutral	Neutral	Neutral	Neutral	Neutral	Neutral	Neutral	Neutral
2	2	2	2	3	strongly Agree	strongly Agree	strongly Agree	strongly Agree	strongly Agree	Agree	Agree	strongly Agree	strongly Agree	strongly Agree	strongly Agree	strongly Agree	strongly Agree	Agree	strongly Agree	strongly Agree	strongly Agree	strongly Agree	Agree	Agree	strongly Agree	Neutral	Agree	strongly Agree	strongly Agree	strongly Agree	strongly Agree	Agree	Agree	strongly Agree
2	5	2	2	5	Neutral	Neutral	Neutral	Neutral	Neutral	Neutral	Neutral	Neutral	Neutral	Neutral	Neutral	Neutral	Neutral	Neutral	Neutral	Neutral	Neutral	Neutral	Neutral	Neutral	Neutral	Neutral	Neutral	Neutral	Neutral	Neutral	Neutral	Neutral	Neutral	Neutral
1	3	2	2	3	strongly Agree	strongly Agree	strongly Agree	strongly Agree	strongly Agree	strongly Agree	strongly Agree	strongly Agree	strongly Agree	strongly Agree	strongly Agree	strongly Agree	strongly Agree	strongly Agree	strongly Agree	strongly Agree	strongly Agree	strongly Agree	strongly Agree	strongly Agree	strongly Agree	strongly Agree	strongly Agree	strongly Agree	strongly Agree	strongly Agree	strongly Agree	strongly Agree	strongly Agree	strongly Agree
1	4	2	2	2	Agree	Agree	Agree	Agree	Agree	Agree	Agree	Agree	Agree	Agree	Agree	Agree	Agree	Agree	Agree	Agree	Agree	Agree	Agree	Agree	Agree	Agree	Agree	Agree	Agree	Agree	Agree	Agree	Agree	Agree
1	2	2	1	3	Disagree	Disagree	Disagree	Agree	Agree	strongly Agree	Agree	Agree	Agree	Agree	Agree	Agree	Neutral	Agree	Agree	Agree	Agree	Agree	Agree	Agree	Agree	Agree	Agree	Agree	Agree	Agree	Agree	Agree	Agree	Agree
2	5	3	1	5	Agree	Agree	Neutral	Agree	Agree	Agree	Agree	Neutral	Neutral	Neutral	Agree	Agree	Agree	Agree	Agree	Agree	Agree	Agree	Neutral	Neutral	Agree	Agree	Agree	Neutral	Disagree	Disagree	Disagree	Neutral	Neutral	Neutral
2	3	2	1	4	Agree	Neutral	Agree	Agree	Agree	Agree	Agree	Agree	Agree	Agree	Agree	Agree	Disagree	Agree	Agree	Agree	Agree	Agree	Agree	Agree	Neutral	Agree	Agree	Agree	Agree	Agree	Agree	Agree	Agree	Agree
2	3	1	2	2	strongly Agree	strongly Agree	strongly Agree	strongly Agree	strongly Agree	strongly Agree	strongly Agree	strongly Agree	strongly Agree	strongly Agree	strongly Agree	strongly Agree	strongly Agree	strongly Agree	strongly Agree	strongly Agree	strongly Agree	strongly Agree	strongly Agree	strongly Agree	strongly Agree	strongly Agree	strongly Agree	strongly Agree	strongly Agree	strongly Agree	strongly Agree	strongly Agree	strongly Agree	strongly Agree
2	2	2	2	4	Neutral	Neutral	Agree	strongly Agree	strongly Agree	strongly Agree	strongly Agree	strongly Agree	strongly Agree	strongly Agree	strongly Agree	strongly Agree	strongly Agree	strongly Agree	strongly Agree	strongly Agree	strongly Agree	strongly Agree	strongly Agree	strongly Agree	strongly Agree	Agree	Agree	strongly Agree	strongly Agree	strongly Agree	strongly Agree	Agree	Agree	Agree
1	4	3	1	5	Neutral	Neutral	Neutral	Neutral	Neutral	Neutral	Neutral	Neutral	Neutral	Neutral	Neutral	Neutral	Neutral	Neutral	Neutral	Neutral	Neutral	Neutral	Neutral	Neutral	Neutral	Neutral	Neutral	Neutral	Neutral	Neutral	Neutral	Neutral	Neutral	Neutral
2	3	2	1	4	strongly Agree	strongly Agree	strongly Agree	strongly Agree	strongly Agree	strongly Agree	strongly Agree	strongly Agree	strongly Agree	strongly Agree	Neutral	Neutral	Neutral	strongly Agree	strongly Agree	strongly Agree	strongly Agree	strongly Agree	strongly Agree	strongly Agree	strongly Agree	strongly Agree	strongly Agree	Disagree	strongly Agree	strongly Agree	strongly Agree	strongly Agree	strongly Agree	strongly Agree
1	5	3	1	5	Neutral	Neutral	Agree	Neutral	Disagree	Disagree	Disagree	Neutral	Disagree	Disagree	Disagree	Disagree	Agree	Neutral	Disagree	Disagree	Disagree	Disagree	Disagree	Neutral	Disagree	Neutral	Neutral	Agree	Disagree	Disagree	Agree	Disagree	Neutral	Neutral
2	4	3	1	5	Neutral	Disagree	Disagree	Neutral	Neutral	strongly disagree	strongly disagree	strongly disagree	strongly disagree	strongly disagree	strongly disagree	strongly disagree	strongly Agree	strongly disagree	strongly disagree	strongly disagree	strongly disagree	strongly disagree	strongly disagree	Disagree	strongly disagree	strongly disagree	strongly disagree	strongly disagree	strongly disagree	strongly disagree	strongly disagree	strongly disagree	strongly disagree	strongly disagree
1	2	2	2	3	Agree	Agree	Agree	strongly Agree	strongly Agree	strongly Agree	strongly Agree	Agree	Agree	strongly Agree	strongly Agree	strongly Agree	strongly Agree	strongly Agree	strongly Agree	strongly Agree	strongly Agree	strongly Agree	strongly Agree	strongly Agree	strongly Agree	Agree	Agree	Agree	Agree	Agree	Agree	strongly Agree	Agree	Agree
1	2	2	1	3	Agree	Neutral	Agree	Agree	Agree	Agree	Neutral	Neutral	strongly Agree	strongly Agree	strongly Agree	strongly Agree	Neutral	Neutral	Agree	Agree	Agree	Agree	strongly Agree	strongly Agree	Agree	strongly Agree	strongly Agree	Agree	strongly Agree	Agree	strongly Agree	Agree	Agree	Agree
1	2	2	2	2	Agree	Agree	Agree	strongly Agree	strongly Agree	strongly Agree	strongly Agree	Neutral	Agree	strongly Agree	strongly Agree	strongly Agree	strongly Agree	strongly Agree	Agree	Agree	Neutral	Neutral	strongly Agree	strongly Agree	strongly Agree	Agree	Agree	Neutral	Agree	Agree	Agree	strongly Agree	strongly Agree	strongly Agree
1	2	2	2	3	Disagree	Neutral	strongly Agree	Disagree	Agree	strongly Agree	Agree	strongly Agree	Agree	strongly Agree	Agree	Neutral	Neutral	Agree	Disagree	strongly disagree	Agree	strongly Agree	strongly Agree	Neutral	Agree	Neutral	Neutral	Disagree	Neutral	Agree	Agree	Neutral	strongly Agree	Agree
2	3	3	1	2	strongly Agree	strongly Agree	strongly Agree	strongly Agree	strongly Agree	strongly Agree	strongly Agree	strongly Agree	strongly Agree	strongly Agree	strongly Agree	strongly Agree	strongly Agree	strongly Agree	strongly Agree	strongly Agree	strongly Agree	strongly Agree	strongly Agree	strongly Agree	strongly Agree	strongly Agree	strongly Agree	strongly Agree	strongly Agree	strongly Agree	strongly Agree	strongly Agree	strongly Agree	strongly Agree
2	5	3	1	5	Neutral	Agree	Agree	Agree	Agree	Agree	Agree	Agree	Agree	strongly disagree	Agree	strongly Agree	Agree	Disagree	Agree	strongly Agree	Agree	Agree	Neutral	Agree	Agree	Disagree	Disagree	strongly disagree	strongly disagree	strongly disagree	strongly disagree	Neutral	Neutral	Neutral
2	2	3	1	2	Neutral	Disagree	Agree	strongly Agree	strongly Agree	strongly Agree	strongly Agree	Agree	Agree	strongly Agree	strongly Agree	strongly Agree	strongly Agree	strongly Agree	strongly Agree	strongly Agree	strongly Agree	strongly Agree	strongly Agree	strongly Agree	strongly Agree	strongly Agree	strongly Agree	strongly Agree	strongly Agree	strongly Agree	strongly Agree	strongly Agree	strongly Agree	strongly Agree
2	3	2	1	3	Agree	Neutral	Agree	Agree	Agree	Agree	Neutral	Agree	Agree	Agree	Agree	Agree	Agree	Agree	Agree	Agree	Agree	Neutral	Neutral	Agree	Agree	Agree	Agree	Neutral	Agree	Neutral	Neutral	Agree	Agree	Neutral
2	5	2	2	5	Agree	Agree	Agree	strongly Agree	strongly Agree	strongly Agree	strongly Agree	Neutral	Neutral	strongly Agree	strongly Agree	strongly Agree	strongly Agree	strongly Agree	strongly Agree	strongly Agree	strongly Agree	strongly Agree	strongly Agree	strongly Agree	strongly Agree	strongly Agree	strongly Agree	Agree	Agree	Agree	Agree	Agree	Agree	Agree
1	2	2	1	3	Neutral	Neutral	Agree	strongly Agree	strongly Agree	strongly Agree	strongly Agree	strongly Agree	strongly Agree	strongly Agree	strongly Agree	strongly Agree	strongly Agree	Agree	strongly Agree	strongly Agree	strongly Agree	strongly Agree	strongly Agree	strongly Agree	strongly Agree	strongly Agree	strongly Agree	strongly Agree	strongly Agree	strongly Agree	strongly Agree	strongly Agree	strongly Agree	strongly Agree
2	3	2	2	4	strongly disagree	Neutral	Disagree	strongly disagree	strongly disagree	Disagree	strongly disagree	Neutral	Disagree	strongly disagree	strongly disagree	strongly disagree	strongly disagree	strongly disagree	strongly Agree	strongly Agree	strongly Agree	strongly Agree	strongly disagree	strongly disagree	strongly disagree	Disagree	Disagree	strongly disagree	strongly disagree	strongly Agree	strongly Agree	strongly disagree	strongly disagree	Disagree
1	4	3	1	5	Agree	Agree	Agree	strongly Agree	strongly Agree	strongly Agree	strongly Agree	strongly Agree	strongly Agree	strongly Agree	strongly Agree	strongly Agree	Disagree	strongly Agree	strongly Agree	strongly Agree	Agree	strongly Agree	strongly Agree	strongly Agree	strongly Agree	strongly Agree	strongly Agree	strongly Agree	strongly Agree	strongly Agree	strongly Agree	strongly Agree	strongly Agree	strongly Agree
1	3	3	1	4	Agree	Agree	Agree	strongly Agree	strongly Agree	strongly Agree	strongly Agree	strongly Agree	strongly Agree	Agree	Agree	Agree	strongly Agree	strongly Agree	Agree	Agree	Agree	Agree	Agree	Agree	Agree	strongly Agree	strongly Agree	strongly Agree	strongly Agree	strongly Agree	strongly Agree	strongly Agree	strongly Agree	strongly Agree
2	2	2	2	2	strongly Agree	Neutral	Neutral	Agree	Agree	Neutral	Neutral	Disagree	Disagree	Disagree	Neutral	Neutral	Agree	Agree	Neutral	Neutral	Neutral	Neutral	Neutral	Neutral	Neutral	Disagree	Disagree	Disagree	Disagree	Disagree	Disagree	Neutral	Neutral	Neutral
1	2	2	1	2	Disagree	Neutral	Neutral	strongly Agree	strongly Agree	strongly Agree	strongly Agree	Neutral	Agree	strongly Agree	strongly Agree	strongly Agree	strongly Agree	Neutral	Neutral	Neutral	Neutral	Neutral	strongly Agree	strongly Agree	strongly Agree	Agree	Agree	Agree	Neutral	Neutral	Neutral	Agree	Neutral	Neutral
2	2	2	1	2	Agree	Agree	Agree	Agree	Agree	Agree	Agree	Agree	Agree	Agree	Agree	Agree	Agree	Agree	Agree	Agree	Agree	Agree	Agree	Agree	Agree	Agree	Agree	Agree	Agree	Agree	Agree	Agree	Agree	Agree
1	3	2	1	3	Agree	Agree	Agree	Agree	Agree	Agree	Agree	Agree	Agree	Agree	Agree	Agree	Agree	Agree	Agree	Agree	Agree	Agree	Agree	Agree	Agree	Agree	Agree	Agree	Agree	Agree	Agree	Agree	Agree	Agree
2	4	3	1	5	strongly Agree	strongly Agree	Agree	Neutral	Neutral	Neutral	Neutral	Neutral	Neutral	Agree	strongly disagree	strongly disagree	strongly Agree	Agree	Agree	Agree	Agree	Agree	Agree	Agree	Agree	Neutral	Neutral	Neutral	Neutral	Neutral	Neutral	Agree	Agree	Agree
1	3	2	1	3	Neutral	Neutral	Neutral	Agree	Agree	Agree	Agree	Agree	Agree	Neutral	Neutral	Neutral	strongly disagree	Disagree	Agree	Neutral	Neutral	Neutral	Agree	Agree	Neutral	Agree	Agree	Agree	Neutral	Agree	Agree	Neutral	Agree	Agree
2	3	2	2	5	Disagree	Neutral	Agree	strongly disagree	strongly disagree	Disagree	strongly disagree	strongly disagree	strongly disagree	Disagree	Neutral	Neutral	Disagree	Disagree	Disagree	strongly disagree	Disagree	strongly disagree	strongly disagree	strongly disagree	Disagree	Disagree	strongly disagree	Neutral	Disagree	strongly disagree	strongly disagree	strongly disagree	Disagree	Disagree
1	4	2	2	3	Agree	strongly Agree	Agree	strongly Agree	strongly Agree	strongly Agree	strongly Agree	Disagree	Agree	strongly Agree	Agree	Agree	strongly Agree	strongly Agree	Agree	Agree	Agree	Agree	strongly Agree	strongly Agree	strongly Agree	Agree	Agree	Neutral	strongly Agree	strongly Agree	strongly Agree	strongly Agree	Agree	Agree
2	2	2	1	2	Disagree	Agree	Agree	Agree	Agree	Agree	Agree	Agree	Agree	Agree	Agree	Agree	Agree	Agree	Agree	Agree	Agree	Agree	Agree	Agree	Agree	Agree	Agree	Agree	Agree	Agree	Agree	Agree	Agree	Agree
1	4	3	1	5	strongly Agree	strongly Agree	strongly Agree	strongly Agree	strongly Agree	strongly Agree	strongly Agree	Neutral	Agree	strongly Agree	strongly Agree	strongly Agree	Agree	strongly Agree	strongly Agree	strongly Agree	strongly Agree	strongly Agree	strongly Agree	strongly Agree	strongly Agree	strongly Agree	strongly Agree	strongly Agree	strongly Agree	strongly Agree	strongly Agree	strongly Agree	strongly Agree	strongly Agree
1	2	2	1	2	Agree	Agree	Agree	Agree	Agree	strongly Agree	strongly Agree	Neutral	Agree	strongly Agree	strongly Agree	strongly Agree	strongly Agree	strongly Agree	Agree	Agree	Agree	Agree	Agree	Agree	Agree	strongly Agree	strongly Agree	Agree	Agree	Agree	Agree	Agree	Agree	Agree
1	2	2	2	4	Agree	Disagree	Agree	strongly Agree	strongly Agree	strongly Agree	strongly Agree	strongly Agree	strongly Agree	strongly Agree	strongly Agree	strongly Agree	strongly Agree	strongly Agree	strongly Agree	strongly Agree	strongly Agree	strongly Agree	strongly Agree	strongly Agree	strongly Agree	strongly Agree	strongly Agree	strongly Agree	strongly Agree	strongly Agree	strongly Agree	Agree	strongly Agree	strongly Agree
2	3	2	1	3	Neutral	Neutral	Agree	strongly Agree	strongly Agree	strongly Agree	Agree	strongly disagree	Neutral	strongly Agree	strongly Agree	strongly Agree	strongly disagree	Agree	strongly Agree	strongly Agree	Neutral	strongly Agree	strongly Agree	strongly Agree	strongly Agree	strongly Agree	strongly Agree	Neutral	Agree	strongly Agree	strongly Agree	strongly Agree	strongly Agree	strongly Agree
2	2	2	1	2	strongly Agree	strongly Agree	Agree	strongly Agree	strongly Agree	strongly Agree	strongly Agree	Disagree	Disagree	strongly Agree	strongly Agree	strongly Agree	Agree	strongly Agree	strongly Agree	strongly Agree	strongly Agree	strongly Agree	strongly Agree	strongly Agree	strongly Agree	Agree	Agree	strongly Agree	strongly Agree	strongly Agree	strongly Agree	Agree	Agree	Agree
1	4	3	1	5	Agree	Agree	Agree	Agree	Agree	strongly Agree	Agree	strongly Agree	strongly Agree	strongly Agree	strongly Agree	strongly Agree	strongly disagree	Agree	strongly Agree	strongly Agree	strongly Agree	strongly Agree	strongly Agree	strongly Agree	strongly Agree	strongly Agree	strongly Agree	strongly Agree	strongly Agree	strongly Agree	strongly Agree	Agree	Agree	Agree
2	2	3	1	4	strongly Agree	strongly Agree	strongly Agree	strongly Agree	strongly Agree	strongly Agree	strongly Agree	strongly Agree	strongly Agree	strongly Agree	strongly Agree	strongly Agree	strongly Agree	strongly Agree	strongly Agree	strongly Agree	strongly Agree	strongly Agree	strongly Agree	strongly Agree	strongly Agree	strongly Agree	strongly Agree	strongly Agree	strongly Agree	strongly Agree	strongly Agree	strongly Agree	strongly Agree	strongly Agree
1	4	2	1	5	Neutral	Neutral	Neutral	Neutral	Neutral	strongly Agree	strongly Agree	strongly disagree	Neutral	strongly Agree	strongly Agree	strongly Agree	strongly Agree	strongly Agree	Neutral	Neutral	Neutral	Neutral	strongly Agree	strongly Agree	strongly Agree	Agree	Agree	Neutral	Neutral	Neutral	Neutral	strongly Agree	strongly Agree	strongly Agree
1	4	3	1	5	strongly Agree	strongly Agree	Agree	Neutral	Neutral	Neutral	Neutral	Neutral	Neutral	Neutral	Neutral	Neutral	Neutral	Neutral	Neutral	Neutral	Neutral	Neutral	Neutral	Neutral	Neutral	Neutral	Neutral	Neutral	Neutral	Neutral	Neutral	Neutral	Neutral	Neutral
2	4	2	2	5	Neutral	Neutral	Neutral	Neutral	Neutral	Neutral	Neutral	Neutral	Neutral	Neutral	Neutral	Neutral	Neutral	Neutral	Neutral	Neutral	Neutral	Neutral	Neutral	Neutral	Neutral	Neutral	Neutral	Neutral	Disagree	Disagree	Disagree	Neutral	Neutral	Neutral
2	2	2	1	2	Neutral	Neutral	Neutral	Disagree	Disagree	Disagree	Neutral	Agree	Agree	Neutral	Neutral	Neutral	Neutral	Neutral	Neutral	Neutral	Neutral	Neutral	strongly Agree	strongly Agree	strongly Agree	Neutral	Neutral	Neutral	Neutral	Neutral	Neutral	strongly Agree	strongly Agree	strongly Agree
2	2	2	1	3	Neutral	Neutral	Neutral	Agree	Agree	strongly Agree	strongly Agree	strongly Agree	strongly Agree	Neutral	Agree	Agree	Neutral	Neutral	Neutral	Neutral	Neutral	Neutral	Agree	Agree	Neutral	Agree	Agree	Neutral	Agree	strongly Agree	strongly Agree	Agree	Neutral	Agree
1	2	2	2	3	strongly Agree	strongly Agree	strongly Agree	strongly Agree	strongly Agree	strongly Agree	strongly Agree	Neutral	strongly Agree	strongly Agree	strongly Agree	strongly Agree	Neutral	strongly Agree	strongly Agree	strongly Agree	strongly Agree	strongly Agree	strongly Agree	strongly Agree	strongly Agree	strongly Agree	strongly Agree	strongly Agree	strongly Agree	strongly Agree	strongly Agree	strongly Agree	strongly Agree	strongly Agree
1	3	2	2	3	Neutral	Disagree	Agree	Neutral	Neutral	strongly Agree	Agree	Agree	Agree	Agree	Agree	strongly Agree	strongly Agree	Agree	Neutral	Neutral	Neutral	Agree	strongly Agree	Agree	Neutral	Agree	Agree	Disagree	Agree	Agree	Agree	strongly Agree	Agree	Agree
1	2	2	1	2	Neutral	Neutral	Neutral	Neutral	Neutral	Neutral	Agree	Disagree	strongly Agree	Agree	Agree	Agree	Neutral	Disagree	Agree	Agree	Agree	Agree	Neutral	Neutral	Neutral	Agree	Agree	Neutral	Neutral	Neutral	Neutral	Agree	Agree	Agree
1	3	3	1	4	strongly Agree	strongly Agree	strongly Agree	strongly Agree	strongly Agree	strongly Agree	strongly Agree	strongly Agree	strongly Agree	strongly Agree	strongly Agree	strongly Agree	Disagree	strongly Agree	strongly Agree	strongly Agree	strongly Agree	strongly Agree	strongly Agree	strongly Agree	strongly Agree	strongly Agree	strongly Agree	Agree	Agree	strongly Agree	strongly Agree	strongly Agree	strongly Agree	strongly Agree
2	2	2	1	2	Neutral	Neutral	Agree	strongly Agree	strongly Agree	strongly Agree	Agree	Disagree	Disagree	Agree	Agree	Agree	Agree	Neutral	Neutral	Neutral	Agree	Neutral	Agree	Agree	Neutral	Agree	Agree	Agree	Neutral	Agree	Neutral	Agree	Agree	Agree
2	2	3	1	2	strongly Agree	Neutral	Agree	Agree	Agree	Agree	Agree	Neutral	Agree	strongly Agree	strongly Agree	Neutral	Agree	strongly Agree	Neutral	strongly Agree	strongly Agree	strongly Agree	strongly Agree	strongly Agree	strongly Agree	strongly Agree	strongly Agree	Agree	Agree	Agree	Agree	Agree	Agree	Agree
2	3	2	2	4	Neutral	Neutral	Agree	strongly Agree	strongly Agree	strongly Agree	strongly Agree	Agree	Agree	Agree	Agree	Agree	Neutral	Agree	Agree	Agree	Agree	Agree	Agree	Agree	Agree	Neutral	Neutral	Neutral	strongly Agree	strongly Agree	strongly Agree	Agree	Agree	Agree
1	2	2	2	3	Agree	Agree	Agree	strongly Agree	strongly Agree	strongly Agree	strongly Agree	Neutral	Agree	Agree	Agree	Agree	Neutral	Neutral	Neutral	Neutral	Neutral	Neutral	Agree	Agree	Agree	strongly Agree	strongly Agree	strongly Agree	Agree	strongly Agree	strongly Agree	Agree	Agree	Agree
2	3	2	2	4	strongly Agree	Agree	strongly Agree	strongly Agree	strongly Agree	strongly Agree	strongly Agree	Agree	strongly Agree	strongly Agree	strongly Agree	strongly Agree	strongly Agree	strongly Agree	strongly Agree	strongly Agree	Agree	Agree	strongly Agree	strongly Agree	Agree	Agree	Agree	strongly Agree	strongly Agree	strongly Agree	strongly Agree	strongly Agree	strongly Agree	strongly Agree
2	2	2	1	2	strongly Agree	Neutral	Neutral	strongly disagree	strongly disagree	strongly disagree	Disagree	Agree	strongly Agree	strongly disagree	strongly disagree	strongly disagree	strongly Agree	strongly disagree	Disagree	Neutral	strongly disagree	Disagree	Disagree	strongly disagree	strongly disagree	Agree	Neutral	Neutral	strongly disagree	strongly disagree	strongly disagree	Neutral	Agree	Neutral
2	2	2	2	4	strongly disagree	Neutral	Neutral	Neutral	Neutral	strongly disagree	Neutral	strongly disagree	strongly disagree	Neutral	Neutral	Neutral	strongly disagree	Neutral	Agree	Neutral	Disagree	Neutral	Neutral	Neutral	Neutral	Disagree	Agree	Agree	Neutral	Neutral	Neutral	Neutral	Disagree	Neutral
2	3	2	2	3	Agree	Agree	Agree	strongly Agree	strongly Agree	strongly Agree	strongly Agree	Agree	Agree	strongly Agree	Neutral	strongly disagree	strongly Agree	strongly Agree	strongly Agree	strongly Agree	strongly Agree	strongly Agree	strongly Agree	strongly Agree	strongly Agree	strongly Agree	strongly Agree	strongly Agree	strongly Agree	strongly Agree	Agree	Agree	Agree	Agree
1	4	2	2	5	Disagree	Neutral	Disagree	Disagree	Disagree	Disagree	Disagree	Disagree	Neutral	Disagree	Disagree	Disagree	Disagree	Disagree	Disagree	Disagree	Disagree	Disagree	Neutral	Disagree	Disagree	Disagree	Disagree	Disagree	Disagree	Neutral	Disagree	Disagree	Disagree	Disagree
1	2	2	2	3	Neutral	Neutral	Neutral	Neutral	Neutral	Neutral	Neutral	Neutral	Neutral	Agree	Agree	Agree	Neutral	Neutral	Neutral	Neutral	Neutral	Neutral	Agree	Neutral	Agree	Disagree	Neutral	Neutral	Agree	Agree	Agree	Neutral	Neutral	Neutral
2	3	2	2	3	Agree	Agree	Agree	Agree	Agree	Agree	Agree	Neutral	Agree	Agree	Agree	Agree	Agree	Agree	Agree	Agree	Agree	Agree	Agree	Agree	Agree	Agree	Agree	Agree	Agree	Agree	Agree	Agree	Agree	Agree
2	2	3	1	3	Agree	strongly Agree	strongly Agree	strongly Agree	strongly Agree	strongly Agree	strongly Agree	Disagree	strongly disagree	strongly Agree	strongly Agree	strongly Agree	strongly Agree	Agree	strongly Agree	strongly Agree	strongly Agree	strongly Agree	strongly Agree	Neutral	strongly Agree	strongly Agree	strongly Agree	strongly Agree	strongly Agree	strongly Agree	strongly Agree	strongly Agree	strongly Agree	strongly Agree
2	3	2	2	3	Agree	Agree	strongly Agree	strongly Agree	Agree	strongly Agree	Agree	Agree	strongly Agree	Agree	strongly Agree	strongly Agree	Agree	Agree	Agree	strongly Agree	Agree	Agree	Agree	Agree	strongly Agree	Agree	Agree	Agree	Neutral	Neutral	Neutral	Agree	strongly Agree	Agree
1	2	2	1	3	Disagree	Disagree	Disagree	Agree	Agree	Agree	Agree	strongly Agree	Agree	strongly Agree	strongly Agree	strongly Agree	Neutral	Neutral	Agree	Agree	strongly Agree	Agree	Agree	strongly Agree	Agree	strongly Agree	Agree	Agree	strongly Agree	strongly Agree	strongly Agree	Agree	Neutral	Neutral
2	3	2	2	4	Neutral	Neutral	Disagree	Agree	Agree	strongly Agree	strongly Agree	Neutral	Agree	Neutral	Neutral	Agree	strongly Agree	Disagree	Neutral	Neutral	Neutral	Neutral	Neutral	Neutral	Neutral	Agree	Agree	Neutral	strongly Agree	Agree	Agree	Neutral	Neutral	Neutral
2	4	2	2	4	Agree	Agree	Agree	Disagree	Disagree	Disagree	Disagree	Neutral	Neutral	strongly disagree	Agree	Agree	Disagree	Neutral	Neutral	Neutral	Neutral	Neutral	Disagree	Neutral	Neutral	Neutral	Neutral	Neutral	Neutral	Neutral	Neutral	Agree	Agree	Agree
1	2	2	1	3	Neutral	Disagree	strongly Agree	Neutral	strongly Agree	strongly Agree	Agree	strongly disagree	strongly disagree	Disagree	strongly Agree	strongly Agree	strongly Agree	strongly Agree	Neutral	Neutral	Neutral	Neutral	Neutral	Neutral	strongly Agree	strongly Agree	strongly Agree	strongly disagree	strongly Agree	Neutral	Agree	Agree	Neutral	strongly Agree
2	3	2	1	4	strongly Agree	strongly Agree	strongly Agree	strongly Agree	strongly Agree	strongly Agree	strongly Agree	strongly Agree	strongly Agree	strongly Agree	strongly Agree	strongly Agree	Agree	Neutral	strongly Agree	strongly Agree	strongly Agree	strongly Agree	strongly Agree	strongly Agree	strongly Agree	strongly Agree	strongly Agree	strongly Agree	strongly Agree	strongly Agree	strongly Agree	strongly Agree	strongly Agree	strongly Agree
1	2	2	1	3	Agree	Agree	strongly Agree	strongly Agree	strongly Agree	strongly Agree	strongly Agree	Agree	strongly Agree	strongly Agree	strongly Agree	strongly Agree	strongly Agree	Neutral	strongly Agree	Agree	Agree	Agree	Agree	strongly Agree	strongly Agree	Agree	Agree	Agree	strongly Agree	strongly Agree	strongly Agree	strongly Agree	strongly Agree	strongly Agree
2	2	2	2	2	Disagree	Disagree	Neutral	strongly Agree	strongly Agree	Agree	strongly Agree	Disagree	Neutral	strongly disagree	Neutral	Neutral	strongly disagree	Agree	Agree	Agree	Agree	Agree	Agree	strongly Agree	Agree	Neutral	Neutral	Disagree	Agree	Agree	Agree	Agree	Agree	Agree
2	2	2	1	2	Neutral	Neutral	Agree	Agree	Agree	Agree	Agree	Neutral	Neutral	Disagree	Neutral	Neutral	Agree	Neutral	Agree	Agree	Agree	strongly Agree	Neutral	Neutral	Disagree	Neutral	Neutral	Neutral	Agree	Agree	Agree	Agree	Neutral	Agree
1	2	4	2	2	strongly disagree	strongly Agree	strongly Agree	strongly Agree	strongly Agree	strongly Agree	strongly Agree	Agree	Agree	strongly Agree	strongly Agree	strongly Agree	Agree	strongly Agree	strongly Agree	strongly Agree	strongly Agree	strongly Agree	strongly Agree	strongly Agree	strongly Agree	Neutral	Agree	Agree	Agree	strongly Agree	strongly Agree	strongly Agree	strongly Agree	strongly Agree
1	2	2	2	2	Neutral	Neutral	Neutral	Neutral	Neutral	Neutral	Neutral	Neutral	Neutral	Neutral	Neutral	Neutral	Neutral	Neutral	Neutral	Neutral	Neutral	Neutral	Neutral	Neutral	Neutral	Neutral	Neutral	Neutral	Neutral	Neutral	Neutral	Neutral	Neutral	Neutral
2	2	2	2	3	Agree	strongly Agree	strongly Agree	strongly Agree	strongly Agree	strongly Agree	strongly Agree	strongly Agree	strongly Agree	strongly Agree	strongly Agree	strongly Agree	strongly Agree	strongly Agree	strongly Agree	strongly Agree	strongly Agree	strongly Agree	strongly Agree	strongly Agree	strongly Agree	strongly Agree	strongly Agree	Agree	strongly Agree	strongly Agree	strongly Agree	strongly Agree	strongly Agree	strongly Agree
2	3	2	1	2	Agree	Agree	Agree	Agree	Agree	Agree	Agree	Disagree	Disagree	Agree	Agree	Agree	Agree	Agree	Agree	Agree	Agree	Agree	Agree	Agree	Agree	Agree	Agree	Agree	Agree	Agree	Agree	Agree	Agree	Agree
1	3	2	1	3	Neutral	Disagree	Agree	Agree	Agree	Agree	strongly Agree	Agree	Agree	Disagree	Neutral	Agree	strongly Agree	strongly Agree	Agree	Agree	Agree	Agree	Neutral	Neutral	Neutral	Neutral	Neutral	Neutral	Neutral	Neutral	Neutral	Agree	Neutral	Agree
2	4	4	2	2	Neutral	Neutral	Neutral	Neutral	strongly Agree	strongly Agree	strongly Agree	strongly Agree	strongly Agree	Agree	Agree	Agree	strongly Agree	strongly Agree	Agree	Agree	Agree	Agree	Agree	Agree	Agree	Agree	Agree	strongly Agree	Neutral	Neutral	Neutral	Agree	Agree	Agree
1	3	2	2	2	Agree	Disagree	Agree	Neutral	Neutral	Neutral	Neutral	Disagree	Disagree	Neutral	Neutral	Neutral	Neutral	Neutral	Neutral	Neutral	Neutral	Neutral	Neutral	Neutral	Neutral	Neutral	Neutral	Neutral	Neutral	Neutral	Neutral	Neutral	Neutral	Neutral
1	3	2	2	4	Neutral	Neutral	Neutral	Neutral	Neutral	Neutral	Neutral	Neutral	Neutral	Disagree	Disagree	Disagree	Neutral	Neutral	Neutral	Neutral	Neutral	Neutral	Neutral	Neutral	Neutral	Agree	Agree	Disagree	Neutral	Neutral	Neutral	Neutral	Neutral	Neutral
1	3	2	1	4	Agree	Agree	Agree	Agree	Agree	Agree	strongly Agree	Neutral	Neutral	Agree	strongly Agree	strongly Agree	Agree	Agree	Agree	Agree	Agree	Agree	Disagree	Neutral	Agree	Agree	Agree	Agree	Agree	Agree	Agree	Agree	Neutral	Agree
2	2	2	2	4	Agree	Agree	Agree	strongly Agree	strongly Agree	strongly Agree	strongly Agree	Neutral	Neutral	strongly Agree	Neutral	Neutral	strongly Agree	strongly Agree	strongly Agree	strongly Agree	strongly Agree	strongly Agree	Agree	Agree	strongly Agree	strongly Agree	strongly Agree	Agree	Agree	strongly Agree	strongly Agree	Agree	Agree	Agree
1	2	2	2	2	Agree	Agree	Agree	strongly Agree	strongly Agree	strongly Agree	strongly Agree	strongly Agree	strongly Agree	strongly Agree	Neutral	strongly disagree	strongly Agree	Agree	strongly Agree	strongly Agree	strongly Agree	strongly Agree	strongly Agree	strongly Agree	strongly Agree	Agree	Agree	Agree	strongly Agree	strongly Agree	strongly Agree	Agree	Agree	Agree
2	4	3	1	3	Neutral	Neutral	Neutral	Agree	Agree	Agree	Agree	Agree	Agree	Agree	Agree	Agree	Agree	Agree	Agree	Agree	Agree	Agree	Agree	Agree	Agree	Agree	Agree	Agree	Agree	Agree	Agree	Agree	Agree	Agree
2	3	3	1	3	Agree	Agree	Agree	strongly Agree	Agree	Agree	Agree	Agree	Agree	strongly disagree	Disagree	Neutral	Agree	Disagree	Agree	Agree	Agree	Agree	Disagree	Neutral	Disagree	Agree	Agree	Agree	strongly disagree	strongly disagree	Neutral	Agree	Agree	Agree
1	2	2	1	3	Neutral	Agree	Agree	strongly Agree	strongly Agree	strongly Agree	strongly Agree	Neutral	strongly Agree	strongly Agree	strongly disagree	strongly disagree	strongly disagree	strongly Agree	Agree	Agree	Agree	Agree	Agree	Agree	strongly Agree	strongly Agree	strongly Agree	strongly Agree	Agree	Agree	Agree	strongly Agree	strongly Agree	strongly Agree
1	4	3	1	5	Agree	Agree	Agree	strongly Agree	strongly Agree	strongly Agree	strongly Agree	Agree	Agree	strongly Agree	strongly Agree	strongly Agree	strongly Agree	Agree	strongly Agree	strongly Agree	strongly Agree	strongly Agree	strongly Agree	Agree	strongly Agree	strongly Agree	strongly Agree	strongly Agree	strongly Agree	strongly Agree	strongly Agree	strongly Agree	strongly Agree	strongly Agree
1	3	3	1	2	Neutral	Agree	Agree	Agree	Agree	Agree	strongly Agree	Agree	Agree	strongly Agree	Neutral	Neutral	strongly Agree	Agree	Neutral	Neutral	Neutral	Neutral	Agree	Agree	Agree	Agree	Agree	Agree	Agree	Agree	Agree	Agree	Agree	Agree
2	2	3	1	3	Agree	Neutral	Neutral	Agree	Agree	Agree	strongly Agree	Agree	Agree	strongly Agree	strongly Agree	strongly Agree	strongly Agree	Agree	Agree	Agree	Agree	Agree	Agree	Agree	Agree	Agree	Agree	Agree	Agree	Agree	Agree	Agree	Agree	Agree
2	3	2	1	3	Neutral	Agree	Agree	Neutral	Neutral	Neutral	Neutral	Neutral	Disagree	Disagree	Disagree	Disagree	Neutral	Neutral	Neutral	Neutral	Neutral	Neutral	Neutral	Neutral	Neutral	Neutral	Neutral	Neutral	Neutral	Neutral	Neutral	Agree	Agree	Neutral
1	2	2	2	3	Neutral	Agree	Agree	strongly Agree	strongly Agree	strongly Agree	strongly Agree	strongly Agree	Neutral	strongly Agree	Agree	strongly Agree	Agree	Neutral	Agree	strongly Agree	Agree	strongly Agree	Agree	Neutral	Agree	Neutral	Neutral	Agree	Agree	Agree	Agree	Agree	Agree	Neutral
2	2	2	2	3	Agree	Neutral	Agree	Agree	Agree	Agree	Agree	Agree	strongly Agree	Agree	Agree	Neutral	Agree	Agree	Agree	Agree	strongly Agree	strongly Agree	strongly Agree	Agree	strongly Agree	Neutral	Agree	Neutral	Neutral	Neutral	Neutral	Agree	Agree	Agree
